# Supplementary material
Source: HighWire-hosted journal article supplement (https://bmjopen.bmj.com/content/12/5/e052407)

## **Appendix to “Continuity of community-based healthcare provision during COVID-19: a multi-country interrupted time series analysis”**

This appendix provides further methodological details for “Continuity of community-based healthcare provision during COVID-19: a multi-country interrupted time series analysis.” This study appendix provides detailed tables and visualizations of data in an effort to illustrate the transparency of our methodological approach and descriptive analytical steps.

Supplementary methods appendix to “Continuity of community-based healthcare provision during COVID-19: a multi-country interrupted time series analysis”

- **Table 1.** Program Implementation, as assessed by CHW AIM Quality Tool
- **Table 2.** COVID-19 descriptive statistics for March 2020 to June 2021 across all COVID metrics, including min, mean, and max values by month
- **Table 3.** PHC descriptive statistics, mean values for each PHC metric, displayed by metric and by quarter from Q1 2018 to Q2 2021
- **Table 4.** Descriptive trends in numerator and denominator for PHC metrics by month from Q1 2018 to Q2 2021
- **Table 5.** Coverage of data for PHC metrics across five sites and six metrics from January 2018 to June 2021
- **Table 6.** Coverage of data for COVID metrics across five sites and nine metrics from March 2020 to June 2021
- **Table 7.** Results of alternative regression analysis #1
- **Table 8.** Results of alternative regression analysis #2
- **Table 9.** Results of alternative regression analysis #3
- **Figure 1.** Descriptive trends in PHC metrics by quarter from Q1 2018 to Q2 2021
- **Figures 2a-d.** Descriptive trends in COVID metrics by month and quarter from March 2020 to June 2021
- **Figures 3a-f.** Regression outputs for six PHC metrics including time, intervention, postslope & site
- **Figures 4a-f.** Alternative regression #1 outputs for six PHC metrics including time and intervention
- **Figures 5a-f.** Alternative regression #2 outputs for six PHC metrics including time and intervention
- **Figures 6a-f.** Alternative regression #3 outputs for six PHC metrics including time, intervention, postslope, site and year

Supplementary methods appendix to “Continuity of community-based healthcare provision during COVID-19: a multi-country interrupted time series analysis”

**Table 1.** Program Implementation, as assessed by CHW AIM Quality Tool<sup>22</sup>

|  |                      |
|--|----------------------|
|  | Highly functional    |
|  | Functional           |
|  | Partially functional |
|  | Non functional       |

  

| Community Health Worker Assessment and Improvement Matrix (CHW AIM)<br>Updated Program Functionality Matrix for Optimizing Community Health Programs |                                                                                                                                                                                                                                                                                                                                                                                                                                                                                                                                                                                                                                                                                                                                                                                                                                                                                                                                                                         | Regions |   |   |   |   |
|------------------------------------------------------------------------------------------------------------------------------------------------------|-------------------------------------------------------------------------------------------------------------------------------------------------------------------------------------------------------------------------------------------------------------------------------------------------------------------------------------------------------------------------------------------------------------------------------------------------------------------------------------------------------------------------------------------------------------------------------------------------------------------------------------------------------------------------------------------------------------------------------------------------------------------------------------------------------------------------------------------------------------------------------------------------------------------------------------------------------------------------|---------|---|---|---|---|
|                                                                                                                                                      |                                                                                                                                                                                                                                                                                                                                                                                                                                                                                                                                                                                                                                                                                                                                                                                                                                                                                                                                                                         | 1       | 2 | 3 | 4 | 5 |
| Role & Recruitment                                                                                                                                   | <ul style="list-style-type: none"> <li>CHW role is clearly defined and documented</li> <li>CHW to population ratio reflects CHW role expectation, population density, geographic constraints, and travel requirements</li> <li>Recruitment methods and selection criteria designed to maximize women’s participation in the workforce and overcome gender inequities.</li> <li>CHW is recruited from community with community participation</li> <li>Attitudes, expertise, and availability deemed essential for the job are clearly delineated prior to recruitment and linked to competency demonstrations</li> <li>Role of CHWs includes proactively searching for patients door-to-door, care for patients in their homes, and providing training to families on how to identify danger signs.</li> <li>Train-then-select: recruit more CHWs to the first module of pre-service training than are ultimately needed and select the best performers</li> </ul>       |         |   |   |   |   |
| Training                                                                                                                                             | <ul style="list-style-type: none"> <li>Initial training meeting global guidelines is provided to all CHWs within six months of recruitment.</li> <li>CHW training includes practicum time in government health facilities and in the community.</li> <li>Continuous capacity development is provided to reinforce initial training, teach CHWs new skills, and to help ensure quality.</li> </ul>                                                                                                                                                                                                                                                                                                                                                                                                                                                                                                                                                                       |         |   |   |   |   |
| Accreditation                                                                                                                                        | <ul style="list-style-type: none"> <li>Health knowledge and competencies are tested and CHWs must meet a minimum standard prior to practicing.</li> <li>Provisions for CHWs to re-test are in place</li> <li>CHWs are accredited by a national body based on clear documented standards.</li> </ul>                                                                                                                                                                                                                                                                                                                                                                                                                                                                                                                                                                                                                                                                     |         |   |   |   |   |
| Equipment & Supplies                                                                                                                                 | <ul style="list-style-type: none"> <li>All necessary supplies, including job aids, are available with no substantial stockout periods</li> <li>Supplies are ordered and available for resupply on a regular basis and buffer stock is available. At all levels, a standard tool is used for supply forecasting</li> <li>Supplies are checked and updated regularly to verify expiration dates, quality, and inventory.</li> <li>CHW inventory is monitored, whether through manual or digital systems.</li> </ul>                                                                                                                                                                                                                                                                                                                                                                                                                                                       |         |   |   |   |   |
| Supervision                                                                                                                                          | <ul style="list-style-type: none"> <li>A dedicated supervisor conducts monthly supervision visits that include reviewing reports and providing problem- solving support to the CHW.</li> <li>Supervisors are trained, have the technical skills to do service delivery observations, and have basic supervision tools checklists to aid them.</li> <li>The supervisor provides summary statistics of CHW performance to CHW to identify areas for improved service delivery.</li> <li>The supervisor directly observes CHW practice with patients and provides targeted feedback after patient encounters on areas for continued improvement.</li> <li>The supervisor audits data/assesses patient experience (without the CHW present)</li> <li>Program directors have considered how else supervisors can serve CHWs and the community (e.g., restocking supplies, referral support, higher level care, etc.) and have implemented services as applicable.</li> </ul> |         |   |   |   |   |
| Incentive                                                                                                                                            | <ul style="list-style-type: none"> <li>Full-time CHWs are compensated financially at a competitive rate relative to the respective market (at least minimum wage, if not more competitive), and salaries are</li> </ul>                                                                                                                                                                                                                                                                                                                                                                                                                                                                                                                                                                                                                                                                                                                                                 |         |   |   |   |   |

Supplementary methods appendix to “Continuity of community-based healthcare provision during COVID-19: a multi-country interrupted time series analysis”

|                              |                                                                                                                                                                                                                                                                                                                                                                                                                                                                                                                                                                                                                                                                                                                                                                                                                                                                                                                                                                       |  |  |  |  |  |
|------------------------------|-----------------------------------------------------------------------------------------------------------------------------------------------------------------------------------------------------------------------------------------------------------------------------------------------------------------------------------------------------------------------------------------------------------------------------------------------------------------------------------------------------------------------------------------------------------------------------------------------------------------------------------------------------------------------------------------------------------------------------------------------------------------------------------------------------------------------------------------------------------------------------------------------------------------------------------------------------------------------|--|--|--|--|--|
|                              | <ul style="list-style-type: none"> <li>consistently paid on-time.</li> <li>Incentives are balanced, with both financial and non-financial incentives provided, and are commensurate with expectations of CHW role, role</li> <li>The possibility for negative unintended consequences has been examined prior to integrating performance incentives for specific tasks.</li> <li>Health workers receive employee benefits (e.g. housing, vacation etc.)</li> </ul>                                                                                                                                                                                                                                                                                                                                                                                                                                                                                                    |  |  |  |  |  |
| Community Involvement        | <ul style="list-style-type: none"> <li>Community plays a significant role in supporting the CHW and helps to establish the CHW as a leader in the community.</li> <li>CHW is widely recognized and appreciated</li> <li>Community leaders have ongoing dialogue with CHW regarding health issues using data gathered by the CHW.</li> <li>CHW engages existing multi sectoral community structures</li> <li>Community interacts with the supervisor during visits to provide feedback and solve problems.</li> <li>A broad cross-section of the community plays a role in planning the CHW program and providing feedback to the health system.</li> </ul>                                                                                                                                                                                                                                                                                                            |  |  |  |  |  |
| Opportunity for Advancement  | <ul style="list-style-type: none"> <li>Advancement is offered to CHWs who perform well and who express an interest in advancement if the opportunity exists.</li> <li>Training opportunities are offered to CHWs to learn new skills to advance their roles and CHWs are aware of them.</li> <li>Advancement is intended to reward good performance or achievement and is based on a fair evaluation</li> </ul>                                                                                                                                                                                                                                                                                                                                                                                                                                                                                                                                                       |  |  |  |  |  |
| Data                         | <ul style="list-style-type: none"> <li>CHWs document their visits consistently in a standardized format.</li> <li>Supervisors monitor quality of data, discuss data with CHWs, and provide help when needed.</li> <li>Data is reported to public-sector monitoring and evaluation systems.</li> <li>CHWs/communities work with supervisor to use data in problem solving</li> <li>Supervisors use data to provide feedback on CHW performance and inform programmatic improvement.</li> <li>Digital technologies are employed to make data systems more efficient, useable, or scalable and/or leverage data to improve the quality, speed, or equity of service</li> </ul>                                                                                                                                                                                                                                                                                           |  |  |  |  |  |
| Linkage to the Health System | <ul style="list-style-type: none"> <li>CHWs are recognized as part of the formal health system (policies are in place that define their roles, tasks, relationship to the health system).</li> <li>The national health budget has appropriate provisions for CHWs (e.g. salary, equipment, supervision, etc).</li> <li>Health system accompanies CHW deployment with investments to increase the capacity, accessibility, and quality of the primary care facilities and providers to which CHWs link.</li> <li>CHWs always have means for transport and have a functional logistics plan for emergencies (transport, funds).</li> <li>Patients are referred with a standardized form and information flows back to CHW with a returned referral form.</li> <li>Point-of-care user fees are not charged for services or for care commodities.</li> <li>There is multi-sectoral engagement in the design, implementation and management of the CHW program.</li> </ul> |  |  |  |  |  |

Supplementary methods appendix to “Continuity of community-based healthcare provision during COVID-19: a multi-country interrupted time series analysis”

**Table 2.** COVID-19 descriptive statistics for March 2020 to June 2021 across all COVID metrics, including min, mean, and max values by month

| Metric               | Date    | Min   | Mean  | Max   |
|----------------------|---------|-------|-------|-------|
| CHW Infections       | 2020-03 | 0     | 0     | 0     |
| CHW Infections       | 2020-04 | 0     | 0     | 0     |
| CHW Infections       | 2020-05 | 0     | 0     | 0     |
| CHW Infections       | 2020-06 | 0     | 0     | 1     |
| CHW Infections       | 2020-07 | 0     | 0     | 0     |
| CHW Infections       | 2020-08 | 0     | 0     | 1     |
| CHW Infections       | 2020-09 | 0     | 0     | 2     |
| CHW Infections       | 2020-10 | 0     | 0     | 2     |
| CHW Infections       | 2020-11 | 0     | 2     | 11    |
| CHW Infections       | 2020-12 | 0     | 1     | 2     |
| CHW Infections       | 2021-01 | 0     | 0     | 1     |
| CHW Infections       | 2021-02 | 0     | 1     | 3     |
| CHW Infections       | 2021-03 | 0     | 1     | 2     |
| CHW Infections       | 2021-04 | 0     | 1     | 2     |
| CHW Infections       | 2021-05 | 0     | 0     | 1     |
| CHW Infections       | 2021-06 | 0     | 1     | 2     |
| CHW without Symptoms | 2020-03 | 100.0 | 100.0 | 100.0 |
| CHW without Symptoms | 2020-04 | 100.0 | 100.0 | 100.0 |
| CHW without Symptoms | 2020-05 | 99.1  | 99.6  | 100.0 |
| CHW without Symptoms | 2020-06 | 0.1   | 73.8  | 100.0 |
| CHW without Symptoms | 2020-07 | 0.0   | 78.9  | 99.9  |
| CHW without Symptoms | 2020-08 | 0.0   | 78.5  | 100.0 |
| CHW without Symptoms | 2020-09 | 0.0   | 78.0  | 100.0 |
| CHW without Symptoms | 2020-10 | 0.0   | 72.9  | 100.0 |
| CHW without Symptoms | 2020-11 | 0.0   | 78.7  | 100.0 |
| CHW without Symptoms | 2020-12 | 0.0   | 78.9  | 100.0 |
| CHW without Symptoms | 2021-01 | 0.0   | 78.8  | 100.0 |
| CHW without Symptoms | 2021-02 | 0.0   | 78.3  | 100.0 |

Supplementary methods appendix to “Continuity of community-based healthcare provision during COVID-19: a multi-country interrupted time series analysis”

|                             |         |      |      |       |
|-----------------------------|---------|------|------|-------|
| <b>CHW without Symptoms</b> | 2021-03 | 0.0  | 78.1 | 100.0 |
| <b>CHW without Symptoms</b> | 2021-04 | 93.4 | 98.0 | 100.0 |
| <b>CHW without Symptoms</b> | 2021-05 | 89.4 | 97.0 | 100.0 |
| <b>CHW without Symptoms</b> | 2021-06 | 92.7 | 97.3 | 100.0 |
| <b>Contacts Traced</b>      | 2020-03 | 100  | 100  | 100   |
| <b>Contacts Traced</b>      | 2020-04 | 100  | 100  | 100   |
| <b>Contacts Traced</b>      | 2020-05 | 100  | 100  | 100   |
| <b>Contacts Traced</b>      | 2020-06 | 100  | 100  | 100   |
| <b>Contacts Traced</b>      | 2020-07 | 100  | 100  | 100   |
| <b>Contacts Traced</b>      | 2020-08 | 100  | 100  | 100   |
| <b>Contacts Traced</b>      | 2020-09 | 100  | 100  | 100   |
| <b>Contacts Traced</b>      | 2020-10 | 100  | 100  | 100   |
| <b>Contacts Traced</b>      | 2020-11 | 100  | 100  | 100   |
| <b>Contacts Traced</b>      | 2020-12 | 100  | 100  | 100   |
| <b>Contacts Traced</b>      | 2021-01 | 100  | 100  | 100   |
| <b>Contacts Traced</b>      | 2021-02 | 100  | 100  | 100   |
| <b>Contacts Traced</b>      | 2021-03 | 100  | 100  | 100   |
| <b>Contacts Traced</b>      | 2021-04 | 100  | 100  | 100   |
| <b>Contacts Traced</b>      | 2021-05 | 100  | 100  | 100   |
| <b>Contacts Traced</b>      | 2021-06 | 100  | 100  | 100   |
| <b>COVID Equipment</b>      | 2020-03 | -    | -    | -     |
| <b>COVID Equipment</b>      | 2020-04 | -    | -    | -     |
| <b>COVID Equipment</b>      | 2020-05 | 73.8 | 86.9 | 100.0 |
| <b>COVID Equipment</b>      | 2020-06 | 50.9 | 83.6 | 100.0 |
| <b>COVID Equipment</b>      | 2020-07 | 79.2 | 94.4 | 100.0 |
| <b>COVID Equipment</b>      | 2020-08 | 73.2 | 93.1 | 100.0 |
| <b>COVID Equipment</b>      | 2020-09 | 66.9 | 91.4 | 100.0 |
| <b>COVID Equipment</b>      | 2020-10 | 98.4 | 99.5 | 100.0 |
| <b>COVID Equipment</b>      | 2020-11 | 86.0 | 96.3 | 100.0 |

Supplementary methods appendix to “Continuity of community-based healthcare provision during COVID-19: a multi-country interrupted time series analysis”

|                 |         |       |       |       |
|-----------------|---------|-------|-------|-------|
| COVID Equipment | 2020-12 | 89.6  | 97.3  | 100.0 |
| COVID Equipment | 2021-01 | 90.4  | 97.4  | 100.0 |
| COVID Equipment | 2021-02 | 94.3  | 98.4  | 100.0 |
| COVID Equipment | 2021-03 | 90.7  | 97.5  | 100.0 |
| COVID Equipment | 2021-04 | 88.3  | 95.8  | 100.0 |
| COVID Equipment | 2021-05 | 89.1  | 96.1  | 100.0 |
| COVID Equipment | 2021-06 | 87.7  | 95.7  | 100.0 |
| COVID Training  | 2020-03 | 100.0 | 100.0 | 100.0 |
| COVID Training  | 2020-04 | 100.0 | 100.0 | 100.0 |
| COVID Training  | 2020-05 | 99.0  | 99.7  | 100.0 |
| COVID Training  | 2020-06 | 100.0 | 100.0 | 100.0 |
| COVID Training  | 2020-07 | 100.0 | 100.0 | 100.0 |
| COVID Training  | 2020-08 | 100.0 | 100.0 | 100.0 |
| COVID Training  | 2020-09 | 100.0 | 100.0 | 100.0 |
| COVID Training  | 2020-10 | 100.0 | 100.0 | 100.0 |
| COVID Training  | 2020-11 | 100.0 | 100.0 | 100.0 |
| COVID Training  | 2020-12 | 100.0 | 100.0 | 100.0 |
| COVID Training  | 2021-01 | 100.0 | 100.0 | 100.0 |
| COVID Training  | 2021-02 | 100.0 | 100.0 | 100.0 |
| COVID Training  | 2021-03 | 100.0 | 100.0 | 100.0 |
| COVID Training  | 2021-04 | 100.0 | 100.0 | 100.0 |
| COVID Training  | 2021-05 | 100.0 | 100.0 | 100.0 |
| COVID Training  | 2021-06 | 100.0 | 100.0 | 100.0 |
| CHW Deaths      | 2020-03 | 0     | 0     | 0     |
| CHW Deaths      | 2020-04 | 0     | 0     | 0     |
| CHW Deaths      | 2020-05 | 0     | 0     | 0     |
| CHW Deaths      | 2020-06 | 0     | 0     | 0     |
| CHW Deaths      | 2020-07 | 0     | 0     | 0     |
| CHW Deaths      | 2020-08 | 0     | 0     | 0     |

Supplementary methods appendix to “Continuity of community-based healthcare provision during COVID-19: a multi-country interrupted time series analysis”

|                           |         |    |     |     |
|---------------------------|---------|----|-----|-----|
| <b>CHW Deaths</b>         | 2020-09 | 0  | 0   | 0   |
| <b>CHW Deaths</b>         | 2020-10 | 0  | 0   | 0   |
| <b>CHW Deaths</b>         | 2020-11 | 0  | 0   | 0   |
| <b>CHW Deaths</b>         | 2020-12 | 0  | 0   | 0   |
| <b>CHW Deaths</b>         | 2021-01 | 0  | 0   | 0   |
| <b>CHW Deaths</b>         | 2021-02 | 0  | 0   | 0   |
| <b>CHW Deaths</b>         | 2021-03 | 0  | 0   | 0   |
| <b>CHW Deaths</b>         | 2021-04 | 0  | 0   | 0   |
| <b>CHW Deaths</b>         | 2021-05 | 0  | 0   | 0   |
| <b>CHW Deaths</b>         | 2021-06 | 0  | 0   | 1   |
| <b>Contacts Isolating</b> | 2020-03 | -  | -   | -   |
| <b>Contacts Isolating</b> | 2020-04 | -  | -   | -   |
| <b>Contacts Isolating</b> | 2020-05 | 2  | 2   | 2   |
| <b>Contacts Isolating</b> | 2020-06 | 5  | 5   | 5   |
| <b>Contacts Isolating</b> | 2020-07 | 7  | 7   | 7   |
| <b>Contacts Isolating</b> | 2020-08 | 11 | 112 | 212 |
| <b>Contacts Isolating</b> | 2020-09 | 3  | 19  | 34  |
| <b>Contacts Isolating</b> | 2020-10 | 4  | 4   | 4   |
| <b>Contacts Isolating</b> | 2020-11 | 3  | 145 | 287 |
| <b>Contacts Isolating</b> | 2020-12 | 8  | 22  | 36  |
| <b>Contacts Isolating</b> | 2021-01 | 4  | 207 | 410 |
| <b>Contacts Isolating</b> | 2021-02 | 9  | 250 | 491 |
| <b>Contacts Isolating</b> | 2021-03 | 12 | 89  | 166 |
| <b>Contacts Isolating</b> | 2021-04 | 8  | 11  | 13  |
| <b>Contacts Isolating</b> | 2021-05 | 0  | 3   | 6   |
| <b>Contacts Isolating</b> | 2021-06 | 11 | 17  | 22  |
| <b>COVID Deaths</b>       | 2020-03 | 0  | 0   | 0   |
| <b>COVID Deaths</b>       | 2020-04 | 0  | 0   | 0   |
| <b>COVID Deaths</b>       | 2020-05 | 0  | 0   | 0   |



Supplementary methods appendix to “Continuity of community-based healthcare provision during COVID-19: a multi-country interrupted time series analysis”

|                 |         |       |       |       |
|-----------------|---------|-------|-------|-------|
| COVID Deaths    | 2020-06 | 0     | 0     | 0     |
| COVID Deaths    | 2020-07 | 0     | 0     | 0     |
| COVID Deaths    | 2020-08 | 0     | 0     | 0     |
| COVID Deaths    | 2020-09 | 0     | 0     | 0     |
| COVID Deaths    | 2020-10 | 0     | 0     | 0     |
| COVID Deaths    | 2020-11 | 0     | 0     | 0     |
| COVID Deaths    | 2020-12 | 0     | 0     | 0     |
| COVID Deaths    | 2021-01 | 0     | 0     | 0     |
| COVID Deaths    | 2021-02 | 0     | 0     | 0     |
| COVID Deaths    | 2021-03 | 0     | 0     | 0     |
| COVID Deaths    | 2021-04 | 0     | 0     | 0     |
| COVID Deaths    | 2021-05 | 0     | 0     | 0     |
| COVID Deaths    | 2021-06 | 0     | 0     | 0     |
| Suspected Cases | 2020-03 | -     | -     | -     |
| Suspected Cases | 2020-04 | -     | -     | -     |
| Suspected Cases | 2020-05 | 3,432 | 3,432 | 3,432 |
| Suspected Cases | 2020-06 | 0     | 2,099 | 6,253 |
| Suspected Cases | 2020-07 | 0     | 2,101 | 8,281 |
| Suspected Cases | 2020-08 | 0     | 2,215 | 8,700 |
| Suspected Cases | 2020-09 | 0     | 2,038 | 7,894 |
| Suspected Cases | 2020-10 | 0     | 2,040 | 7,894 |
| Suspected Cases | 2020-11 | 0     | 1,602 | 6,157 |
| Suspected Cases | 2020-12 | 0     | 1,342 | 5,164 |
| Suspected Cases | 2021-01 | 0     | 1,182 | 4,510 |
| Suspected Cases | 2021-02 | 0     | 1,204 | 4,583 |
| Suspected Cases | 2021-03 | 0     | 1,089 | 4,083 |
| Suspected Cases | 2021-04 | 0     | 1,153 | 3,320 |
| Suspected Cases | 2021-05 | 0     | 852   | 2,436 |
| Suspected Cases | 2021-06 | 0     | 755   | 2,151 |

Supplementary methods appendix to “Continuity of community-based healthcare provision during COVID-19: a multi-country interrupted time series analysis”

**Table 3.** PHC descriptive statistics, including mean values of each PHC metric, displayed by metric and by quarter from Q1 2018 to Q2 2021

| Metric              | Q1 2018 | Q2 2018 | Q3 2018 | Q4 2018 | Q1 2019 | Q2 2019 | Q3 2019 | Q4 2019 | Q1 2020 | Q2 2020 | Q3 2020 | Q4 2020 | Q1 2021 | Q2 2021 |
|---------------------|---------|---------|---------|---------|---------|---------|---------|---------|---------|---------|---------|---------|---------|---------|
| ICCM Speed          | 30.71   | 28.24   | 29.29   | 30.21   | 30.66   | 30.59   | 27.16   | 26      | 26.14   | 22.53   | 31.22   | 23.86   | 22.76   | 23.67   |
| Pregnancy Speed     | 20.26   | 15.45   | 17.50   | 18.39   | 16.90   | 15.16   | 16.96   | 15.95   | 16.86   | 16.66   | 17.29   | 18.36   | 18.35   | 16.23   |
| PNC Speed           | 80.16   | 79.99   | 82.45   | 80.27   | 81.81   | 82.14   | 84.48   | 83.31   | 86.06   | 87.64   | 87.79   | 87.74   | 85.60   | 87.54   |
| Proactive Coverage  | 28.96   | 30.94   | 29.27   | 32.26   | 33.88   | 43.01   | 50.67   | 52.97   | 54.86   | 55.96   | 58.74   | 58.65   | 56.80   | 54.07   |
| U5 Coverage         | 14.37   | 14.02   | 15.39   | 20.79   | 25.25   | 29.99   | 30.91   | 24.63   | 28.07   | 27.33   | 29.83   | 30.96   | 30.04   | 26.01   |
| Deliveries Coverage | 93.45   | 91.39   | 91.91   | 93.37   | 93.55   | 93.69   | 94.24   | 93.70   | 94.80   | 95.02   | 94.87   | 93.93   | 92.02   | 95.68   |

Supplementary methods appendix to “Continuity of community-based healthcare provision during COVID-19: a multi-country interrupted time series analysis”

**Table 4.** Descriptive trends in numerator and denominator for PHC metrics by month from Q1 2018 to Q2 2021

|        | Deliveries Coverage |      | iCCM Speed |        | PNC Speed |      | Pregnancy Speed |       | Proactive Coverage |          | U5 Coverage |          |
|--------|---------------------|------|------------|--------|-----------|------|-----------------|-------|--------------------|----------|-------------|----------|
|        | Num.                | Den. | Num.       | Den.   | Num.      | Den. | Num.            | Den.  | Num.               | Den.     | Num.        | Den.     |
| Jan-18 | 68                  | 75   | 8538       | 27590  | 970       | 1234 | 426             | 1881  | 72354              | 247522   | 54605       | 336990   |
| Feb-18 | 48                  | 58   | 7928       | 25608  | 890       | 1101 | 513             | 2021  | 82684              | 295954   | 57647       | 372377   |
| Mar-18 | 69                  | 75   | 7580       | 25080  | 966       | 1192 | 487             | 1914  | 88437              | 297755   | 55940       | 377898   |
| Apr-18 | 49                  | 55   | 10435      | 36968  | 1004      | 1254 | 382             | 1972  | 67193              | 282952   | 46841       | 367664   |
| May-18 | 89                  | 98   | 12276      | 42535  | 1250      | 1549 | 420             | 3215  | 110752             | 317335   | 59199       | 406715   |
| Jun-18 | 86                  | 103  | 11363      | 41145  | 1086      | 1371 | 401             | 2568  | 117833             | 344777   | 69997       | 436008   |
| Jul-18 | 229                 | 247  | 11607      | 41055  | 1264      | 1526 | 344             | 2332  | 113052             | 360873   | 79152       | 453826   |
| Aug-18 | 269                 | 287  | 10644      | 35757  | 1274      | 1546 | 444             | 2646  | 107089             | 369743   | 75323       | 474703   |
| Sep-18 | 289                 | 305  | 12256      | 41080  | 1470      | 1790 | 482             | 2980  | 105703             | 384123   | 82599       | 494809   |
| Oct-18 | 615                 | 647  | 12916      | 44233  | 1475      | 1810 | 647             | 3474  | 140194             | 431760   | 117802      | 547808   |
| Nov-18 | 606                 | 642  | 12924      | 43584  | 1237      | 1546 | 576             | 3239  | 144840             | 441181   | 118665      | 561719   |
| Dec-18 | 632                 | 664  | 15036      | 47319  | 1307      | 1648 | 594             | 2819  | 135891             | 431554   | 116051      | 553735   |
| Jan-19 | 606                 | 637  | 14443      | 46996  | 1414      | 1737 | 608             | 3143  | 133916             | 433652   | 118507      | 557313   |
| Feb-19 | 611                 | 629  | 13568      | 45044  | 1263      | 1522 | 615             | 3037  | 147502             | 451934   | 153504      | 568254   |
| Mar-19 | 610                 | 643  | 26533      | 85272  | 1295      | 1598 | 1417            | 9966  | 249781             | 654199   | 169047      | 575284   |
| Apr-19 | 619                 | 652  | 27426      | 88293  | 1283      | 1546 | 1519            | 10821 | 267280             | 652239   | 180364      | 574354   |
| May-19 | 703                 | 735  | 29712      | 96998  | 1338      | 1664 | 1555            | 11534 | 281765             | 654068   | 185228      | 580554   |
| Jun-19 | 592                 | 617  | 33590      | 111632 | 1266      | 1525 | 1876            | 10438 | 288735             | 645470   | 162773      | 573282   |
| Jul-19 | 626                 | 652  | 37822      | 136056 | 1357      | 1586 | 1974            | 11509 | 321351             | 655040   | 177499.4    | 584095   |
| Aug-19 | 615                 | 637  | 38883      | 144957 | 1353      | 1602 | 2005            | 11827 | 342864             | 674979   | 188176.7    | 604670   |
| Sep-19 | 667                 | 689  | 39621      | 147572 | 1408      | 1688 | 2029            | 12087 | 359492             | 694950   | 196912.2    | 625450   |
| Oct-19 | 581                 | 605  | 42503      | 161082 | 1257      | 1508 | 1952            | 11970 | 391760             | 724511   | 179604      | 655795   |
| Nov-19 | 569                 | 600  | 40178      | 157532 | 1202      | 1433 | 1854            | 11663 | 393501             | 736703   | 211764      | 668819   |
| Dec-19 | 688                 | 758  | 36674      | 140435 | 1132      | 1369 | 1460            | 9341  | 371232             | 728938   | 191554      | 661726   |
| Jan-20 | 609                 | 647  | 39319      | 148884 | 1215      | 1440 | 1794            | 10674 | 387821.4           | 738356   | 190924      | 679628   |
| Feb-20 | 550                 | 578  | 40809      | 155734 | 1041      | 1214 | 1996            | 11854 | 413380.4           | 768586.1 | 206376      | 712054.1 |
| Mar-20 | 628                 | 656  | 43851      | 169847 | 1215      | 1380 | 2038            | 11960 | 444825             | 794194.2 | 213906      | 746319.2 |
| Apr-20 | 1777                | 2262 | 41211      | 147861 | 1288      | 1460 | 1688            | 10444 | 432288             | 799701   | 205722      | 771371   |
| May-20 | 1177                | 1542 | 37857      | 162130 | 1334      | 1516 | 1314            | 9813  | 457174             | 825224   | 229187      | 785223   |
| Jun-20 | 1391                | 2033 | 26970      | 164646 | 1228      | 1415 | 882             | 4317  | 489650             | 838382   | 248274      | 801954   |
| Jul-20 | 2158                | 3357 | 13650      | 51509  | 1265      | 1460 | 1258            | 7052  | 480178.8           | 814724.5 | 217437      | 774184.5 |

Supplementary methods appendix to “Continuity of community-based healthcare provision during COVID-19: a multi-country interrupted time series analysis”

|               |      |      |       |       |        |      |      |       |              |              |        |              |
|---------------|------|------|-------|-------|--------|------|------|-------|--------------|--------------|--------|--------------|
| <b>Aug-20</b> | 1670 | 2509 | 17720 | 53061 | 1336   | 1509 | 1281 | 7487  | 454944<br>.5 | 847815<br>.9 | 250141 | 806160<br>.9 |
| <b>Sep-20</b> | 1317 | 1869 | 18963 | 56168 | 1507   | 1709 | 1854 | 11041 | 469117<br>.2 | 807430<br>.9 | 253131 | 768549<br>.9 |
| <b>Oct-20</b> | 33   | 1317 | 1869  | 18963 | 56168  | 1507 | 1709 | 1854  | 11041        | 487653       | 791628 | 247951       |
| <b>Nov-20</b> | 34   | 946  | 1330  | 18865 | 56645  | 1265 | 1462 | 1973  | 11039        | 491972       | 844555 | 255330       |
| <b>Dec-20</b> | 35   | 1649 | 2565  | 42909 | 253806 | 1338 | 1513 | 1961  | 10381        | 500770       | 847483 | 246715       |
| <b>Jan-21</b> | 36   | 1529 | 2420  | 54248 | 253960 | 1509 | 1710 | 1759  | 9595         | 496196       | 846592 | 241588       |
| <b>Feb-21</b> | 37   | 1062 | 1578  | 51717 | 244396 | 1135 | 1299 | 1804  | 9262         | 478823       | 860205 | 239363       |
| <b>Mar-21</b> | 38   | 1109 | 1734  | 52558 | 256153 | 961  | 1144 | 1821  | 10290        | 495543       | 873498 | 245411       |
| <b>Apr-21</b> | 39   | 1457 | 2365  | 60507 | 227557 | 1044 | 1222 | 1898  | 10615        | 510566       | 880119 | 258957       |
| <b>May-21</b> | 40   | 1072 | 1574  | 63841 | 269937 | 1085 | 1244 | 1852  | 10883        | 517378       | 889075 | 254464       |
| <b>Jun-21</b> | 41   | 1029 | 1374  | 61438 | 267360 | 1177 | 1330 | 1736  | 10801        | 510574       | 893683 | 248356       |

Supplementary methods appendix to “Continuity of community-based healthcare provision during COVID-19: a multi-country interrupted time series analysis”

**Table 5.** Coverage of data for PHC metrics across five sites and seven metrics from January 2018 to June 2021

| Metric                     | Region 1        | Region 2        | Region 3        | Region 4        | Region 5        | Region 1 | Region 2 | Region 3 | Region 4 | Region 5 | Total |
|----------------------------|-----------------|-----------------|-----------------|-----------------|-----------------|----------|----------|----------|----------|----------|-------|
| <b>Deliveries Coverage</b> | Jan-18 - Jun-21 |                 | Jul-18 - Jun-21 | Jan-18 - Jun-21 | Oct-18 - Jun-21 | 42       |          | 36       | 42       | 33       | 153   |
| <b>ICCM Speed</b>          | Jan-18 - Jun-21 | Apr-18 - Jun-21 |                 | Jan-18 - Jun-21 |                 | 42       | 39       |          | 42       |          | 123   |
| <b>PNC Speed</b>           | Jan-18 - Jun-21 |                 |                 | Jan-18 - Jun-21 |                 | 42       |          |          | 42       |          | 84    |
| <b>Pregnancy Speed</b>     | Jan-18 - Jun-21 | Jan-18 - Jun-21 | Jul-18 - Jun-21 | Jan-18 - Jun-21 | Oct-18 - Jun-21 | 42       | 42       | 36       | 42       | 33       | 195   |
| <b>Proactive Coverage</b>  | Mar-19 - Jun-21 | Jan-18 - Jun-21 | Jan-19 - Jun-21 | Feb-18 - Jun-21 | Oct-18 - Jun-21 | 28       | 42       | 30       | 41       | 33       | 174   |
| <b>U5 Coverage</b>         | Jan-18 - Jun-21 | Jan-18 - Jun-21 | Jan-19 - Jun-20 | Jan-18 - Jun-21 | Oct-18 - Jun-21 | 42       | 42       | 18       | 42       | 33       | 177   |
| <b>Total</b>               |                 |                 |                 |                 |                 | 238      | 165      | 120      | 251      | 132      |       |

Supplementary methods appendix to “Continuity of community-based healthcare provision during COVID-19: a multi-country interrupted time series analysis”

**Table 6.** Coverage of data for COVID metrics across five sites and nine metrics from March 2020 to June 2021

|               | Indicator          | No. | Uganda Site     | Kenya Site #1   | Kenya Site #2   | Mali Site       | Malawi Site     | Uganda Site | Kenya Site #1 | Kenya Site #2 | Mali Site | Malawi Site | Total # of Months of Data |
|---------------|--------------------|-----|-----------------|-----------------|-----------------|-----------------|-----------------|-------------|---------------|---------------|-----------|-------------|---------------------------|
| COVID Metrics | COVID Training     | 1   | May 20 - Jun 21 | Jun 20 - Mar 21 | May 20 - Jun 21 | Jul 20 - Jun 21 | Mar 20 - Jun 21 | 14          | 10            | 14            | 12        | 16          | 66                        |
|               | COVID Equipment    | 2   | May 20 - Jun 21 | Jun 20 - Mar 21 | May 20 - Jun 21 | Jul 20 - Jun 21 |                 | 14          | 10            | 14            | 12        |             | 50                        |
|               | CHW Symptoms       | 3   | May 20 - Jun 21 | Jun 20 - Mar 21 | Jun 20 - Jun 21 | Jul 20 - Jun 21 | Mar 20 - Jun 21 | 14          | 10            | 13            | 12        | 16          | 65                        |
|               | CHW infections     | 4   | May 20 - Jun 21 | Jun 20 - Mar 21 | Jun 20 - Jun 21 | Jul 20 - Jun 21 | Mar 20 - Jun 21 | 14          | 10            | 13            | 12        | 16          | 65                        |
|               | CHW deaths         | 5   | May 20 - Jun 21 | Jun 20 - Mar 21 | Jun 20 - Jun 21 | Jul 20 - Jun 21 | Mar 20 - Jun 21 | 14          | 10            | 13            | 12        | 16          | 65                        |
|               | Suspected cases    | 6   | May 20 - Jun 21 | Jun 20 - Mar 21 | Jun 20 - Jun 21 | Jul 20 - Jun 21 |                 | 14          | 10            | 13            | 12        |             | 49                        |
|               | COVID Deaths       | 7   | May 20 - Jun 21 | Jun 20 - Mar 21 |                 |                 | Mar 20 - Jun 21 | 14          | 10            |               |           | 16          | 40                        |
|               | Contacts traced    | 8   |                 | Jun 20 - Mar 21 |                 |                 |                 |             | 10            |               |           |             | 10                        |
|               | Contacts isolating | 9   | May 20 - Jun 21 | Jun 20 - Mar 21 |                 |                 | Aug 20 - Jun 21 | 14          | 10            |               |           | 11          | 35                        |
| Total         |                    |     |                 |                 |                 |                 |                 | 112         | 90            | 80            | 72        | 91          | 445                       |

Supplementary methods appendix to “Continuity of community-based healthcare provision during COVID-19: a multi-country interrupted time series analysis”

**Figure 1.** Mean percent for each PHC indicator by quarter for Q1 2018 to Q2 2021

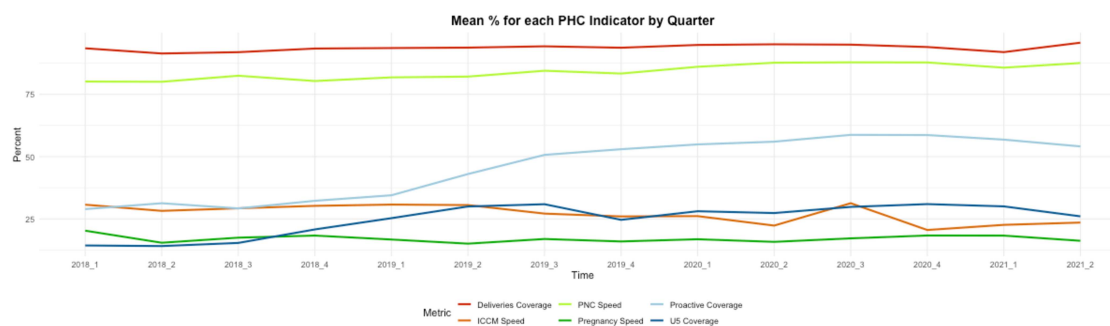

Supplementary methods appendix to “Continuity of community-based healthcare provision during COVID-19: a multi-country interrupted time series analysis”

**Figures 2a-d.** Descriptive trends in COVID metrics by month (a-b) and by quarter (c-d) from March 2020 to June 2021, including mean % and counts for each metric with a) and c) including all indicators and b) and d) excluding data on suspected cases

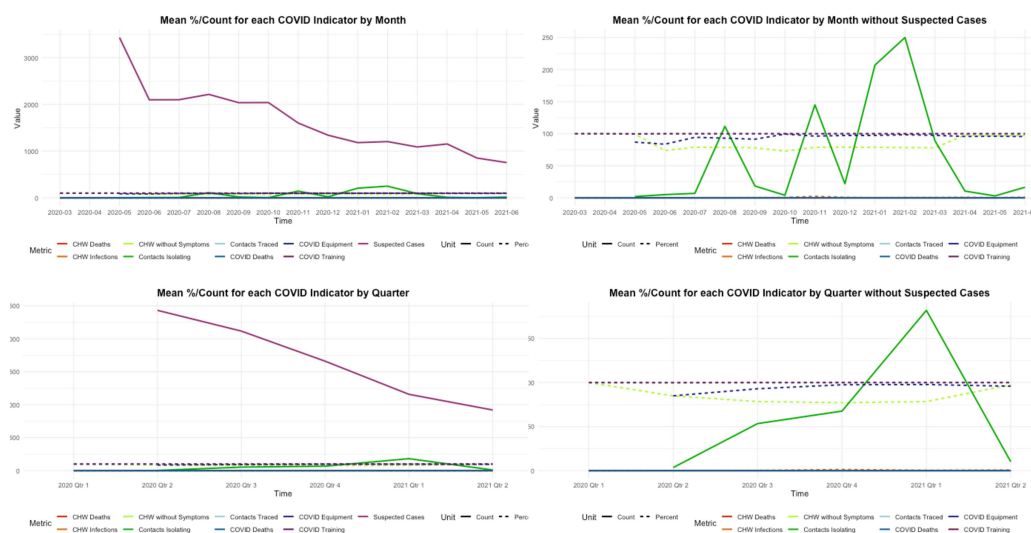



Supplementary methods appendix to “Continuity of community-based healthcare provision during COVID-19: a multi-country interrupted time series analysis”

**Figures 3 a-f.** Regression outputs for six PHC metrics including time, intervention, postslope & site

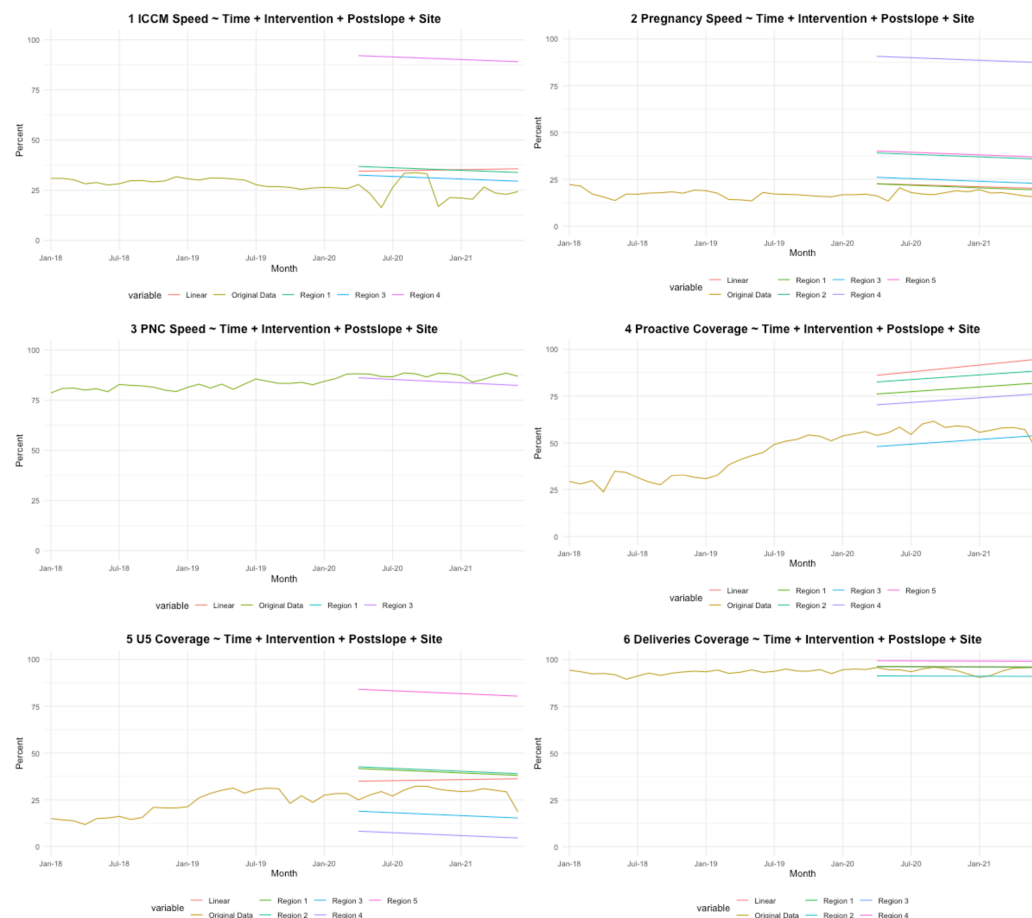

In addition to the a priori regression analysis included in the main analysis, the study team conducted exploratory sensitivity analysis. These alternate regression analyses are outlined below:

#### Alternative regression analysis #1:

$$(1) Y_t = \beta_0 + \beta_1 * \text{time} + \beta_2 * \text{pandemic} + \beta_3 * \text{postslope} + \epsilon_t$$

Where  $Y_t$  is the outcome variable at time  $t$ ; time is a continuous variable indicating time from January 2018 up to June 2021, the end of the period of observation. Intervention (i.e., the Covid-19 pandemic) is coded 0 for pre-pandemic time points and 1 for post-pandemic time points, with March 2020 as null; and postslope is coded 0 up to the last point before the intervention phase and coded sequentially thereafter.  $\beta_0$  captures the baseline level of the outcome at time 0 (January 2018, beginning of the period);  $\beta_1$  estimates the structural trend or

Supplementary methods appendix to “Continuity of community-based healthcare provision during COVID-19: a multi-country interrupted time series analysis”

growth rate in utilization, independently from the pandemic;  $\beta_2$  estimates the immediate impact of the pandemic or the change in level in the outcomes of interest after the pandemic; and  $\beta_3$  reflects the change in trend, or growth rate in outcome, after the intervention.

**Table 7.** Results of alternative regression analysis #1

| Metric                                          | Independent Variables      | Coefficient | Standard Error | P-value     |
|-------------------------------------------------|----------------------------|-------------|----------------|-------------|
| ICCM Speed                                      | Constant ( $\beta_0$ )     | 48.93       | 11.62          | <0.0001***  |
|                                                 | Time ( $\beta_1$ )         | 0.09        | 0.71           | 0.90        |
|                                                 | Intervention ( $\beta_2$ ) | 1.89        | 14.90          | 0.90        |
|                                                 | Postslope ( $\beta_3$ )    | -0.69       | 1.78           | 0.70        |
| Pregnancy Speed                                 | Constant ( $\beta_0$ )     | 48.94       | 12.65          | 0.000152*** |
|                                                 | Time ( $\beta_1$ )         | -1.40       | 0.49           | 0.004602**  |
|                                                 | Intervention ( $\beta_2$ ) | 5.09        | 4.49           | 0.26        |
|                                                 | Postslope ( $\beta_3$ )    | 2.68        | 1.18           | 0.024891*   |
| PNC Speed                                       | Constant ( $\beta_0$ )     | 69.85       | 7.84           | <0.0001***  |
|                                                 | Time ( $\beta_1$ )         | 0.61        | 0.53           | 0.26        |
|                                                 | Intervention ( $\beta_2$ ) | -8.99       | 14.08          | 0.53        |
|                                                 | Postslope ( $\beta_3$ )    | -1.02       | 1.36           | 0.46        |
| Proactive Coverage                              | Constant ( $\beta_0$ )     | 19.44       | 13.17          | 0.14        |
|                                                 | Time ( $\beta_1$ )         | 2.76        | 0.37           | <0.0001***  |
|                                                 | Intervention ( $\beta_2$ ) | 0.73        | 3.34           | 0.83        |
|                                                 | Postslope ( $\beta_3$ )    | -4.58       | 0.87           | <0.0001***  |
| U5 Coverage                                     | Constant ( $\beta_0$ )     | 30.41       | 30.59          | 0.32        |
|                                                 | Time ( $\beta_1$ )         | 1.84        | 0.24           | <0.0001***  |
|                                                 | Intervention ( $\beta_2$ ) | 4.61        | 3.03           | 0.13        |
|                                                 | Postslope ( $\beta_3$ )    | -5.40       | 0.57           | <0.0001***  |
| Deliveries Coverage                             | Constant ( $\beta_0$ )     | 91.99       | 1.98           | <0.0001***  |
|                                                 | Time ( $\beta_1$ )         | 0.08        | 0.12           | 0.49        |
|                                                 | Intervention ( $\beta_2$ ) | 2.01        | 1.65           | 0.23        |
|                                                 | Postslope ( $\beta_3$ )    | -0.25       | 0.28           | 0.39        |
| Significance codes: **** 0.001 *** 0.01 ** 0.05 |                            |             |                |             |

Supplementary methods appendix to “Continuity of community-based healthcare provision during COVID-19: a multi-country interrupted time series analysis”

**Figures 4a-f.** Alternative regression #1 outputs for six PHC metrics including time, intervention, and postslope

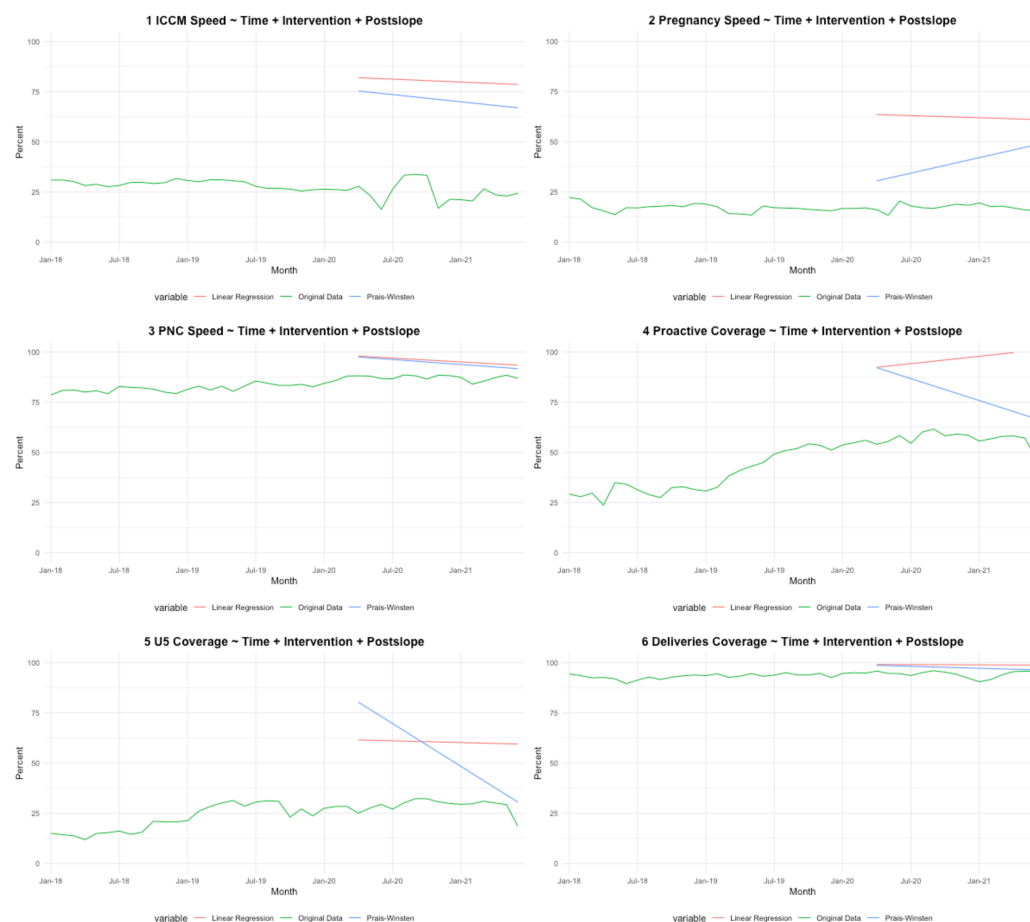

### Alternative regression analysis #2:

$$(2) Y_t = \beta_0 + \beta_1 * \text{preslope} + \beta_2 * \text{pandemic} + \beta_3 * \text{postslope} + \epsilon_t$$

Where  $Y_t$  is the outcome variable at time  $t$ ; time is a continuous variable indicating time from January 2018 up to June 2021, the end of the period of observation. Preslope is coded sequentially from the start of the study period until the start of the intervention, as which point it remains constant; intervention (i.e., the Covid-19 pandemic) is coded 0 for pre-pandemic time points and 1 for post-pandemic time points, with March 2020 as null; and postslope is coded 0 up to the last point before the intervention phase and coded sequentially thereafter.  $\beta_0$  captures the baseline level of the outcome at time 0 (January 2018, beginning of the period);  $\beta_1$  estimated the structural trend in the outcome prior to the pandemic;  $\beta_2$  estimates the immediate impact

Supplementary methods appendix to “Continuity of community-based healthcare provision during COVID-19: a multi-country interrupted time series analysis”

of the pandemic or the change in level in the outcomes of interest after the pandemic; and  $\beta_3$  reflects the change in trend, or growth rate in outcome, after the intervention.

**Table 8.** Results of alternative regression analysis #2

| Metric                                          | Independent Variables   | Coefficient | Standard Error | P-value     |
|-------------------------------------------------|-------------------------|-------------|----------------|-------------|
| ICCM Speed                                      | Constant ( $\beta_0$ )  | 48.93       | 11.62          | <0.0001***  |
|                                                 | Preslope ( $\beta_1$ )  | 0.09        | 0.71           | 0.90        |
|                                                 | Intervention (B2)       | 1.89        | 14.90          | 0.90        |
|                                                 | Postslope ( $\beta_3$ ) | -0.60       | 1.41           | 0.67        |
| Pregnancy Speed                                 | Constant ( $\beta_0$ )  | 48.94       | 12.65          | 0.000152*** |
|                                                 | Preslope ( $\beta_1$ )  | -1.40       | 0.49           | 0.004602**  |
|                                                 | Intervention (B2)       | 5.09        | 4.49           | 0.26        |
|                                                 | Postslope ( $\beta_3$ ) | 1.28        | 0.75           | 0.09        |
| PNC Speed                                       | Constant ( $\beta_0$ )  | 69.85       | 7.84           | <0.0001***  |
|                                                 | Preslope ( $\beta_1$ )  | 0.61        | 0.53           | 0.26        |
|                                                 | Intervention (B2)       | -8.99       | 14.08          | 0.53        |
|                                                 | Postslope ( $\beta_3$ ) | -0.41       | 1.21           | 0.73        |
| Proactive Coverage                              | Constant ( $\beta_0$ )  | 19.44       | 13.17          | 0.14        |
|                                                 | Preslope ( $\beta_1$ )  | 2.76        | 0.37           | <0.0001***  |
|                                                 | Intervention (B2)       | 0.73        | 3.34           | 0.83        |
|                                                 | Postslope ( $\beta_3$ ) | -1.82       | 0.54           | 0.000841*** |
| U5 Coverage                                     | Constant ( $\beta_0$ )  | 30.41       | 30.59          | 0.32        |
|                                                 | Preslope ( $\beta_1$ )  | 1.84        | 0.24           | <0.0001***  |
|                                                 | Intervention (B2)       | 4.61        | 3.03           | 0.13        |
|                                                 | Postslope ( $\beta_3$ ) | -3.56       | 0.38           | <0.0001***  |
| Deliveries Coverage                             | Constant ( $\beta_0$ )  | 91.99       | 1.98           | <0.0001***  |
|                                                 | Preslope ( $\beta_1$ )  | 0.08        | 0.12           | 0.49        |
|                                                 | Intervention (B2)       | 2.01        | 1.65           | 0.23        |
|                                                 | Postslope ( $\beta_3$ ) | -0.16       | 0.19           | 0.40        |
| Significance codes: **** 0.001 *** 0.01 ** 0.05 |                         |             |                |             |

Supplementary methods appendix to “Continuity of community-based healthcare provision during COVID-19: a multi-country interrupted time series analysis”

**Figures 5a-f.** Alternative regression #2 outputs for six PHC metrics including preslope, intervention, and postslope

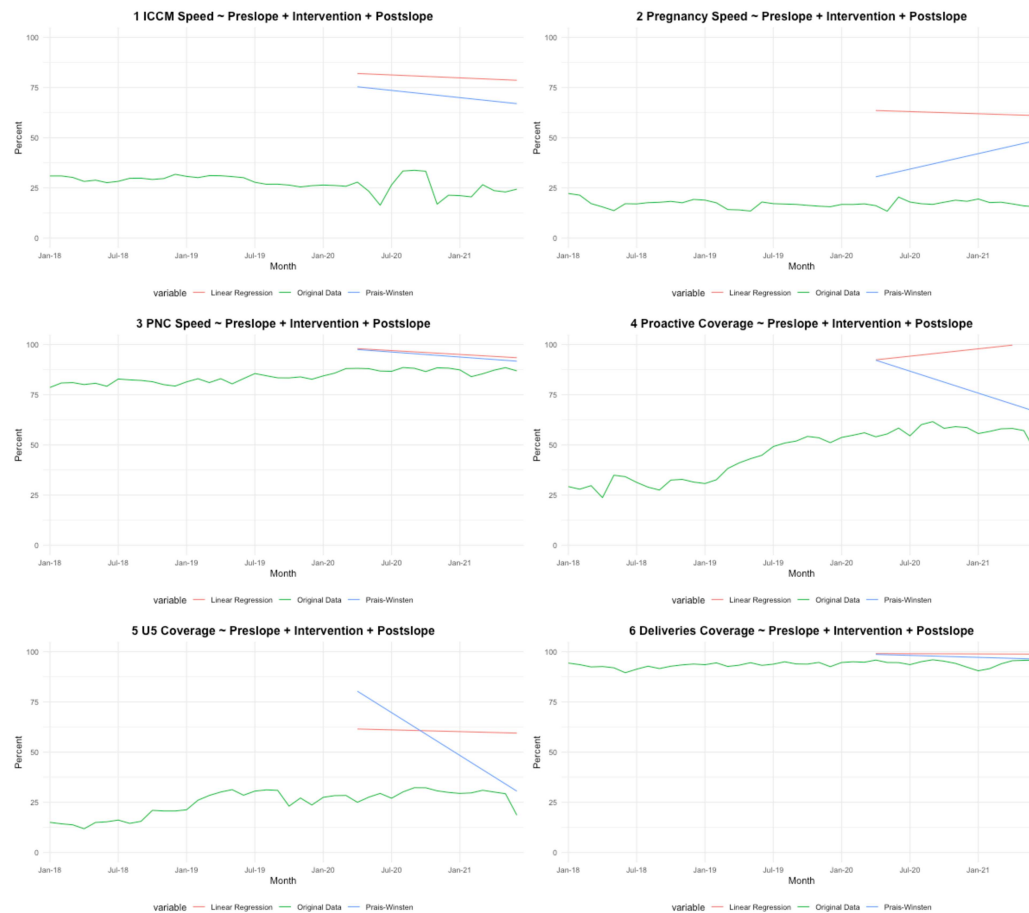

Supplementary methods appendix to “Continuity of community-based healthcare provision during COVID-19: a multi-country interrupted time series analysis”

**Alternative regression analysis #3:**

$$(3) Y_t = \beta_0 + \beta_1 * \text{time} + \beta_2 * \text{pandemic} + \beta_3 * \text{postslope} + \text{region} + \text{year} + \varepsilon_t$$

Where  $Y_t$  is the outcome variable at time  $t$ ; time is a continuous variable indicating time from January 2018 up to June 2021, the end of the period of observation. Intervention (i.e., the Covid-19 pandemic) is coded 0 for pre-pandemic time points and 1 for post-pandemic time points, with March 2020 as null; and postslope is coded 0 up to the last point before the intervention phase and coded sequentially thereafter.  $\beta_0$  captures the baseline level of the outcome at time 0 (January 2018, beginning of the period);  $\beta_1$  estimates the structural trend or growth rate in utilization, independently from the pandemic;  $\beta_2$  estimates the immediate impact of the pandemic or the change in level in the outcomes of interest after the pandemic; and  $\beta_3$  reflects the change in trend, or growth rate in outcome, after the intervention. Region is a dummy variable for each of the five regions and year is a dummy variable for each year in the data.

**Table 9.** Results of alternative regression analysis #3

| Metric          | Independent Variables      | Coefficient | Standard Error | P-value    |
|-----------------|----------------------------|-------------|----------------|------------|
| ICCM Speed      | Constant ( $\beta_0$ )     | 24.68       | 2.16           | <0.0001*** |
|                 | Time ( $\beta_1$ )         | 0.27        | 0.22           | 0.22       |
|                 | Intervention ( $\beta_2$ ) | -1.59       | 2.17           | 0.47       |
|                 | Postslope ( $\beta_3$ )    | -0.38       | 0.41           | 0.36       |
|                 | Region 2                   | -4.35       | 0.86           | <0.0001*** |
|                 | Region 4                   | 55.28       | 0.87           | <0.0001*** |
|                 | Year 2019                  | 3.09        | 2.87           | 0.28       |
|                 | Year 2020                  | 3.13        | 3.85           | 0.42       |
|                 | Year 2021                  | 3.02        | 4.40           | 0.50       |
| Pregnancy Speed | Constant ( $\beta_0$ )     | 10.12       | 2.30           | <0.0001*** |
|                 | Time ( $\beta_1$ )         | 0.03        | 0.22           | 0.90       |
|                 | Intervention ( $\beta_2$ ) | 4.78        | 3.16           | 0.13       |
|                 | Postslope ( $\beta_3$ )    | -0.29       | 0.44           | 0.50       |
|                 | Region 2                   | 3.48        | 2.02           | 0.09       |
|                 | Region 3                   | 16.54       | 2.13           | <0.0001*** |
|                 | Region 4                   | 68.12       | 2.04           | <0.0001*** |
|                 | Region 5                   | 17.56       | 2.19           | <0.0001*** |
|                 | Year 2019                  | 1.68        | 2.81           | 0.55       |
|                 | Year 2020                  | 1.34        | 4.42           | 0.76       |
|                 | Year 2021                  | 1.84        | 5.51           | 0.74       |
| PNC Speed       | Constant ( $\beta_0$ )     | 74.69       | 7.23           | <0.0001*** |
|                 | Time ( $\beta_1$ )         | 1.19        | 0.92           | 0.20       |

Supplementary methods appendix to “Continuity of community-based healthcare provision during COVID-19: a multi-country interrupted time series analysis”

|                                                 |                            |        |       |            |
|-------------------------------------------------|----------------------------|--------|-------|------------|
|                                                 | Intervention ( $\beta_2$ ) | 8.81   | 15.86 | 0.58       |
|                                                 | Postslope ( $\beta_3$ )    | -0.60  | 1.97  | 0.76       |
|                                                 | Region 3                   | -17.13 | 5.01  | 0.00104**  |
|                                                 | Year 2019                  | -1.49  | 12.86 | 0.91       |
|                                                 | Year 2020                  | -34.86 | 20.78 | 0.10       |
|                                                 | Year 2021                  | -42.89 | 25.82 | 0.10       |
| <b>Proactive Coverage</b>                       | Constant ( $\beta_0$ )     | 44.58  | 9.90  | <0.0001*** |
|                                                 | Time ( $\beta_1$ )         | 1.03   | 0.39  | 0.00863**  |
|                                                 | Intervention ( $\beta_2$ ) | -1.98  | 2.84  | 0.49       |
|                                                 | Postslope ( $\beta_3$ )    | -0.36  | 0.80  | 0.65       |
|                                                 | Region 2                   | -29.65 | 5.87  | <0.0001*** |
|                                                 | Region 3                   | 6.89   | 6.98  | 0.33       |
|                                                 | Region 4                   | -6.77  | 8.36  | 0.42       |
|                                                 | Region 5                   | 23.35  | 9.58  | 0.01596*   |
|                                                 | Year 2019                  | -2.03  | 3.30  | 0.54       |
|                                                 | Year 2020                  | 2.79   | 4.33  | 0.52       |
|                                                 | Year 2021                  | -1.18  | 5.08  | 0.82       |
| <b>U5 Coverage</b>                              | Constant ( $\beta_0$ )     | 32.71  | 8.60  | 0.000203*  |
|                                                 | Time ( $\beta_1$ )         | 0.14   | 0.23  | 0.53       |
|                                                 | Intervention ( $\beta_2$ ) | -0.10  | 1.74  | 0.96       |
|                                                 | Postslope ( $\beta_3$ )    | -0.37  | 0.54  | 0.50       |
|                                                 | Region 2                   | -24.03 | 4.41  | <0.0001*** |
|                                                 | Region 3                   | 0.93   | 6.98  | 0.89       |
|                                                 | Region 4                   | -33.94 | 8.33  | <0.0001*** |
|                                                 | Region 5                   | 42.40  | 10.43 | <0.0001*** |
|                                                 | Year 2019                  | -0.27  | 1.72  | 0.88       |
|                                                 | Year 2020                  | 3.61   | 2.37  | 0.13       |
|                                                 | Year 2021                  | 2.70   | 2.94  | 0.36       |
| <b>Deliveries Coverage</b>                      | Constant ( $\beta_0$ )     | 92.90  | 0.72  | <0.0001*** |
|                                                 | Time ( $\beta_1$ )         | -0.04  | 0.08  | 0.59       |
|                                                 | Intervention ( $\beta_2$ ) | 1.04   | 1.22  | 0.40       |
|                                                 | Postslope ( $\beta_3$ )    | 0.05   | 0.16  | 0.74       |
|                                                 | Region 3                   | 4.62   | 0.58  | <0.0001*** |
|                                                 | Region 4                   | -4.98  | 0.55  | <0.0001*** |
|                                                 | Region 5                   | 3.14   | 0.60  | <0.0001*** |
|                                                 | Year 2019                  | 0.60   | 1.01  | 0.55       |
|                                                 | Year 2020                  | 1.05   | 1.67  | 0.53       |
|                                                 | Year 2021                  | 0.73   | 2.06  | 0.72       |
| Significance codes: **** 0.001 *** 0.01 ** 0.05 |                            |        |       |            |

Supplementary methods appendix to “Continuity of community-based healthcare provision during COVID-19: a multi-country interrupted time series analysis”

**Figures 6a-f.** Alternative regression #3 outputs for six PHC metrics including time, intervention, postslope, site and year

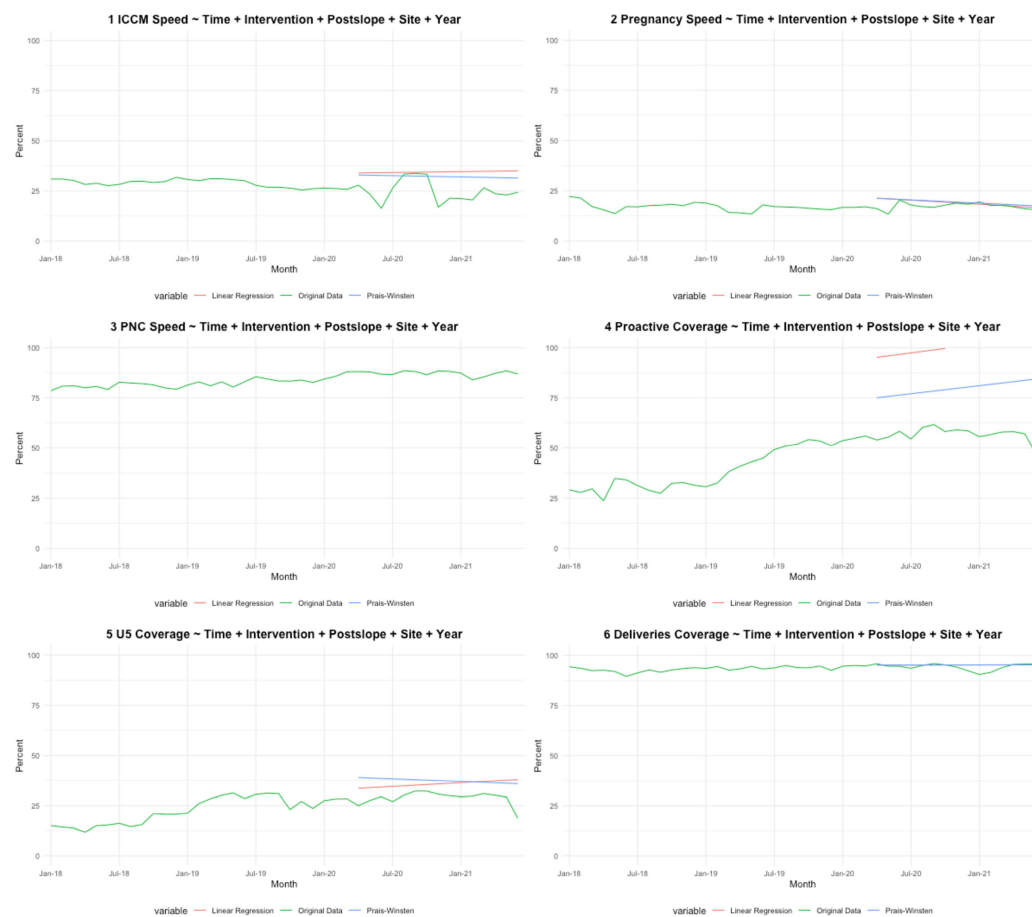

Supplement: inline-supplementary-material-1 [file inline-supplementary-material-1.pdf]
